1 **Social dominance and reproduction result in increased integration of oxidative state in**  
2 **males of an African cichlid fish**

3

4

5 Robert J. Fialkowski<sup>1</sup>, Shana E. Border<sup>1,2</sup>, Isobel Bolitho<sup>3</sup>, Peter D. Dijkstra<sup>1,4,5</sup>

6

7

8 1 - Central Michigan University, Department of Biology, Mount Pleasant, MI, USA

9 2 - Illinois State University, School of Biological Sciences, Normal, IL, USA

10 3 - University of Manchester, Department of Earth and Environmental Sciences, Manchester,

11 UK.

12 4 - Neuroscience Program, Central Michigan University, Mount Pleasant, MI, USA.

13 5 - Institute for Great Lakes Research, Central Michigan University, Mount Pleasant, MI, USA.

14

15 Corresponding author:

16 Robert Fialkowski

17 Email: [fialk1rj@cmich.edu](mailto:fialk1rj@cmich.edu)

18 Address: 1200 S Franklin St, Mt Pleasant, MI 48859

19 Phone: 630-881-8840

20 Fax: 989-774-3462

21 Figures: 3

22 Tables: 1

23

24 **Abstract**

25 Oxidative stress is a potential cost of social dominance and reproduction, which could mediate  
26 life history trade-offs between current and future reproductive fitness. However, the evidence for  
27 an oxidative cost of social dominance and reproduction is mixed, in part because organisms have  
28 efficient protective mechanisms that can counteract oxidative insults. Further, previous studies  
29 have shown that different aspects of oxidative balance, including oxidative damage and  
30 antioxidant function, varies dramatically between tissue types, yet few studies have investigated  
31 oxidative cost in terms of interconnectedness and coordination within the system. Here, we  
32 tested whether dominant and subordinate males of the cichlid *Astatotilapa burtoni* differ in  
33 integration of different components of oxidative stress. We assessed 7 markers of oxidative  
34 stress, which included both oxidative damage and antioxidant function in various tissue types  
35 (total of 14 measurements). Across all oxidative stress measurements, we found more co-  
36 regulated clusters in dominant males, suggesting that components of oxidative state are more  
37 functionally integrated in dominant males than they are in subordinate males. We discuss how a  
38 high degree of functional integration reflects increased robustness or efficiency of the system  
39 (e.g. increased effectiveness of antioxidant machinery in reducing oxidative damage), but we  
40 also highlight potential costs (e.g. activation of cytoprotective mechanisms may have unwanted  
41 pleiotropic effects). Overall, our results suggest that quantifying the extent of functional  
42 integration across different components of oxidative stress could reveal insights into the  
43 oxidative cost of important life history events.

44

45 **Keywords:** territoriality, social hierarchy, reproduction, reactive oxygen species, antioxidants, life history  
46 trade-offs

47

## 48 **1. Introduction**

49 Oxidative cost has been proposed as a potential mediator of life history trade-offs, such as the  
50 negative correlation between reproduction and longevity (Alonso-Alvarez et al., 2017; Speakman  
51 and Garratt, 2014). Reproduction involves metabolically demanding activities such as egg  
52 production, territorial defense, and parental care, leading to increased levels of reactive oxygen  
53 species (ROS, also referred to as oxidants). The resulting increased production of ROS, if not  
54 sufficiently neutralized by the antioxidant machinery, may lead to increased oxidative stress  
55 (Balaban et al., 2005). Given that accumulation of oxidative stress contributes to compromised  
56 cell health and disease progression, it is plausible that oxidative stress acts as a constraint in life  
57 history decisions, mediating trade-offs between for example fecundity, growth and survival  
58 (Dowling and Simmons, 2009; Monaghan et al., 2009; Speakman et al., 2015). Accordingly,  
59 studies have shown that reproductive effort can increase oxidative damage and decrease  
60 antioxidant capacity in a range of animal species (Christe et al., 2012; Sawecki et al., 2019;  
61 Sharick et al., 2015; Stier et al., 2012), and that oxidative stress can negatively affect survival or  
62 lifespan (Archer et al., 2013; Bize et al., 2008). In many animals species, social dominance is  
63 associated with breeding, and similarly, there is cumulative evidence that social dominance  
64 results in an oxidative cost, especially when high dominance is linked to intense agonistic  
65 interactions (Beaulieu et al., 2014; Border et al., 2019; van de Crommenacker et al., 2011) and/or  
66 increased reproductive effort (Cram et al., 2015; Noguera, 2019; Silva et al., 2018). At the same  
67 time, there are also several studies suggesting there is no oxidative cost of social dominance  
68 and/or reproduction and that breeding may even reduce oxidative stress (Blount et al., 2016;  
69 Costantini et al., 2014; Garratt et al., 2013). This is, in part, due to the fact that organisms have  
70 sophisticated defensive mechanisms, such as antioxidant and repair systems, that can avoid or

71 mitigate the negative consequences of oxidative insults (Hörak and Cohen, 2010; Pamplona and  
72 Costantini, 2011). However, few studies have explored the efficiency or robustness of these  
73 defensive mechanisms that maintain redox homeostasis.

74         Maintaining redox balance requires complex integration of various redox components  
75 both within and across interconnected cells, organs, and tissues. For example, oxidative insults  
76 may activate the transcription factor nrf1 which regulates many detoxifying enzymes and  
77 antioxidant genes (Enomoto et al., 2001). Another example of the highly integrative nature of the  
78 antioxidant response is the fact that exogenous antioxidant supplementation often leads to  
79 compensatory responses such as reduced production of endogenous antioxidants to maintain  
80 oxidative balance (Selman et al., 2006). Therefore, assessing the functional integration and  
81 interconnectedness of multiple oxidative stress variables could provide important information  
82 about the effectiveness of cytoprotective mechanisms that counteract oxidative damage – such as  
83 antioxidant responses – as well as the degree of active regulation of redox balance under stressful  
84 conditions. For example, hybrids of the newt species *Triturus* exhibited a lower level of  
85 functional integration of the antioxidant system compared to the parental species, which was  
86 viewed as a potential oxidative cost of interspecific hybridization (Prokić et al., 2018). Likewise,  
87 short-term flight in zebra finches led to reduced integration across blood redox markers, which  
88 constitutes a potential oxidative cost (Costantini et al., 2013). However, studies examining the  
89 effect of challenging life history events on the degree of functional integration of oxidative stress  
90 components across different tissue types are largely lacking, with previous studies focusing on  
91 only blood or whole body samples (Costantini et al., 2011; Costantini et al., 2013; Prokić et al.,  
92 2018).

93           The cichlid fish *A. burtoni* lives in a lek-like social system in which dominant males  
94 defend a spawning territory while subordinate males are non-territorial and are reproductively  
95 suppressed (Fernald, 2017). This social structure is reproducible in a laboratory setting by  
96 housing several males and females in an aquarium with flowerpot shards acting as spawning  
97 territories to encourage territoriality in several males. Dominance hierarchies in *A. burtoni* are  
98 characterized by intense rates of aggression with dominant males engaging in continual rank  
99 maintenance using border displays and chases (Piefke et al., 2021). Additionally, dominant males  
100 show increased reproductive effort as indicated by larger gonads, brighter coloration, increased  
101 courtship displays, and higher androgen levels compared to subordinate males (Alward et al.,  
102 2020; Border et al., 2018; O’Connell and Hofmann, 2012). We previously found that in *A.*  
103 *burtoni* dominant males had higher levels of plasma oxidative damage (measured as circulating  
104 reactive oxygen metabolites) compared to subordinate males (Border et al., 2019; Border et al.,  
105 2021; Fialkowski et al., 2021). In the current study, we tested the effect of social status on  
106 oxidative stress levels as well as how the integration between different measurements of  
107 oxidative stress varies between social states. Markers of oxidative stress included oxidative DNA  
108 damage, NADPH-oxidase (NOX) activity (which influences ROS generation), total antioxidant  
109 defense and superoxidative dismutase (SOD) activity (more details about these markers can be  
110 found in the method section). Most of these markers were measured in different tissue types  
111 including blood, liver, muscle, and gonads. We predict that dominant males will have higher  
112 levels of oxidative stress (by way of elevated oxidative damage and/or lower total antioxidant  
113 capacity) than subordinate males in most tissue types, but we expect this pattern to be redox  
114 marker- and tissue-specific. We also predict that dominant and subordinate males differ in the  
115 degree of integration between different measurements of oxidative stress.

116

## 117 **2. Methods**

118

### 119 *2.1 Animals and housing*

120 The cichlid *Astatotilapia burtoni* used in this study were descended from a wild-caught stock  
121 population from Lake Tanganyika. Fish were housed in aquaria kept at 28°C with a 12-h  
122 light/dark cycle and 10 min each dusk and dawn period to mimic natural settings. Aquaria  
123 contained gravel substrate and terracotta shelters. Fish were fed a combination of cichlid flakes  
124 (Omega Sea LLC) and granular food (Allied Aqua) each morning. Continuous water flow and  
125 central mechanical and biological filtration occurred throughout the entirety of the experiment.  
126 All fish used in this experiment were initially housed as larvae and juveniles in 110-L tanks until  
127 they were approximately 4 months of age, after which they were transferred to a 407-L tank until  
128 randomly selected individuals were transferred to experimental tanks. All fish used in this  
129 experiment were adults and had been raised in mixed-sex groups. Experimental males were  
130 tagged just below the dorsal fin with colored beads attached to a plastic tag using a stainless-steel  
131 tagging gun (Avery-Dennison, Pasadena, CA). All procedures were approved by Central  
132 Michigan University Institutional Animal Care and Use Committee (IACUC protocol 15-22).

133

### 134 *2.2 Experimental design*

135 We divided experimental 110-L tanks in half widthwise with clear, perforated acrylic barriers to  
136 create two compartments as described elsewhere (Fialkowski et al., 2021). In each experimental  
137 compartment we placed a group comprised of three males and five females ( $n=31$  groups). Fish  
138 were between 10 – 12 months of age. Males were weighed and their standard length (SL) was

139 measured before adding them to the experimental tanks. We provided one flowerpot shard in  
140 each compartment which was occupied by the dominant male in each group. In most groups (27  
141 out of 31) the largest male (at least 0.1 g bigger than the other males) attained social dominance  
142 while the other two males in each group became subordinate. Hence, social status was mostly,  
143 albeit not perfectly, assigned based on size asymmetry. The initial body mass of dominant males  
144 was  $5.2 \pm 0.2$  g (range 2.6 – 6.8,  $n=31$ ) and subordinate males was  $4.2 \pm 0.1$  g (range 3.0 – 6.0,  
145  $n=31$ ). Given the considerable size overlap between social states *across* groups, size is unlikely a  
146 confounding factor. Fish were able to interact physically with members in their own group and  
147 visually with those in the adjacent compartment, allowing for the full expression of dominant  
148 behaviors, including aggressive interactions between dominant males between compartments.  
149 We collected tissue and blood from the dominant male and one randomly selected subordinate  
150 male after housing fish in this arrangement for 6 – 7 weeks.

151

### 152 *2.3 Behavioral observations*

153 We recorded male social status (dominant or subordinate) three times per week following a two  
154 week stabilization period as described previously (Border et al., 2019). In brief, dominant males  
155 were brightly colored, defended a flowerpot and had a dark eye bar while subordinate males are  
156 cryptically colored and shoal with females. We filmed each group in the morning before 10 a.m.  
157 weekly during the final 4 weeks of the experiment, with the final recording made on the morning  
158 of tissue collection. For each group, we quantified the behaviors of the focal males (dominant  
159 male and subordinate male for which we collected tissue) over a five-minute period. One person  
160 scored the frequency of chases, lateral displays, border displays, cave visits, courtship displays,  
161 and flees as previously described (Fialkowski et al., 2021). We were unable to carry out the

162 observations blind with respect to social status due to the readily apparent differences in  
163 coloration and behaviors observed between dominant and subordinate males. Behavioral coding  
164 was completed using Behavioral Observation Research Interactive Software (BORIS)(Friard and  
165 Gamba, 2016).

166

#### 167 *2.4 Tissue sampling methods*

168 Immediately following the final behavioral observation, we removed focal males (one dominant  
169 and one subordinate male) to collect blood and tissue. Males were weighed and their standard  
170 length was measured before blood was drawn. Blood time for each male was measured as the  
171 time from initial disruption of the tank (when the lid was removed) to the completion of blood  
172 collection for that individual ranging from 2.5 -11.75 minutes, with individuals processed in a  
173 randomized order with respect to social status. We collected approximately 25-100  $\mu$ L of blood  
174 from each male ( $n=31$  each). Blood was drawn through the dorsal aorta using heparinized 26-  
175 gauge butterfly needles (Terumo) and transferred to heparinized centrifuge tubes that were  
176 placed on ice.

177       Immediately after blood was drawn, males were euthanized via rapid cervical transection  
178 and tissues (gonads, liver, muscle) were collected and flash frozen in liquid nitrogen. Gonads  
179 were weighed prior to freezing. Frozen tissue samples were immediately placed in 2 mL tubes on  
180 a M15 Coolrack block (Biocision, Larkspur, CA, USA) on dry ice. Tissue collection time  
181 (measured as the time from initial disruption of the tank to freezing tissue) ranged from 3.1 –  
182 23.0 minutes. Blood samples were centrifuged for 10 minutes at 4000g before plasma red blood  
183 cells were separated. Blood cells, plasma and tissue samples were stored at  $-80^{\circ}\text{C}$  until used for  
184 analysis.



185

## 186 *2.5 Measurement of oxidative stress*

187

### 188 *2.5.1 Choice of markers of oxidative stress*

189 As an overall marker of oxidative stress, we selected plasma reactive oxygen metabolites  
190 (ROMs). ROMs are primarily organic hydroperoxides which include a range of oxidized  
191 substrates, such as polyunsaturated fatty acids, proteins and nucleic acids, and thus represents a  
192 comprehensive measure of oxidative damage (Costantini, 2016). We measured plasma  
193 antioxidant capacity in three ways: total antioxidant capacity (TAC), the OXY-adsorbent Test  
194 (OXY), and the Biological Antioxidant Potential Test (BAP). TAC is a cumulative measure of  
195 total antioxidants based on the ability of antioxidants with both low molecular weight and high  
196 molecular weight (such as enzymatic antioxidants) to scavenge peroxy radicals using the oxygen  
197 radical absorbance capacity (ORAC) assay (Marrocco et al., 2017)). Like TAC, OXY also  
198 measures total antioxidant capacity but it is based on a different biochemical reaction (it  
199 measures the ability of plasma to withstand oxidative insult from hypochlorous acid) and tends  
200 not to measure larger, enzymatic antioxidants. The OXY assay was selected because it is a  
201 widely used marker for systemic levels of total antioxidant capacity including in haplochromine  
202 cichlid fish (Dijkstra et al., 2011; Dijkstra et al., 2016). The BAP test is based on iron oxidation  
203 and provides insight into more dynamic antioxidant activity of substances with lower molecular  
204 weight. In addition to plasma TAC, we measured TAC in liver, gonad, and muscle using the  
205 ORAC assay. We also measured superoxide dismutase (SOD) activity, an important enzymatic  
206 antioxidant that removes oxygen radicals via conversion to molecular oxygen and uric acid. SOD  
207 was measured it in the liver and gonads. Oxidative DNA damage was evaluated by measuring

208 levels of 8-hydroxy-2'-deoxyguanosine (8-OhDG) in red blood cells, liver, and gonads. As an  
209 indirect marker of ROS production, we measured nicotinamide adenine dinucleotide phosphate-  
210 oxidase (NADPH-oxidase or NOX) activity in the liver and gonads. NOX are a major source of  
211 superoxide (a primary reactive oxygen species) in various tissue cell types (Bedard and Krause,  
212 2007). We were unable to measure muscle NOX and muscle SOD activity due to technical  
213 difficulties (NOX) or lack of sample (SOD). We measured several redox markers in gonadal  
214 tissue since we expected social status differences in the reproductive system. The liver is  
215 particularly vulnerable to oxidative damage and is frequently included in tissue oxidative stress  
216 analyses. Muscle was also selected because of its importance for physical activities.

217 Here we consider increases in (potential) oxidative damage and/or lower antioxidant  
218 capacity as indicative of increased oxidative stress. More specifically, increased DNA damage  
219 and NOX activity may reflect elevated oxidative stress while lower total antioxidant protection  
220 (TAC, OXY, and BAP) could reflect antioxidant depletion under high oxidative stress levels.  
221 However, it is important to note that increased ROS production can lead to compensatory  
222 mechanisms, such as upregulated SOD. It is therefore difficult to interpret SOD findings in  
223 relation to the level of oxidative stress an organism experiences (Monaghan et al., 2009).

224 All samples were run in duplicate and included a pooled sample to evaluate interplate  
225 variability with the exception of SOD. For all assays we used clear flat-bottom 96-well plates  
226 unless indicated otherwise. For all assays, the intra-assay CV (coefficient of variation) and the  
227 inter-assay CV were typically below 5% and 13%, respectively.

228

229 *2.5.2 Protein quantification*

230 The protein concentration of each prepared tissue sample (tissue TAC, SOD, and NOX activity)  
231 was measured with a Bicinchoninic Acid (BCA) Protein Assay kit (Pierce, Rockford IL)  
232 following the manufacturer's protocol. Frozen supernatant was thawed on ice and diluted 1:4  
233 with buffer used in their respective sample preparation. We used 10  $\mu$ L of this diluted  
234 supernatant in the assay. Absorbance was read by a plate reader (Epoch2T, Biotech Instruments,  
235 Winooski, VT, USA).

236

### 237 *2.5.3 Circulating Reactive Oxygen Metabolites (ROMs)*

238 We measured the concentration of plasma ROMs (primarily organic hydroperoxides) in blood  
239 plasma using the widely used d-ROM test (Diacron, Grosseto, Italy) using 4  $\mu$ L plasma per well  
240 as previously described (Border et al., 2019). We calculated values in Carratelli units which was  
241 then converted to H<sub>2</sub>O<sub>2</sub> mg/dL. Absorbance was read by a plate reader (Epoch2T, Biotech  
242 Instruments, Winooski, VT, USA).

243

### 244 *2.5.4 Circulating Antioxidants*

245 *Total Antioxidant Capacity (TAC):* Circulating TAC was determined in diluted blood  
246 plasma (1:100) in 7.4 pH PBS using 20  $\mu$ L of diluted sample via an oxygen radical absorbance  
247 capacity (ORAC) assay as previously described (Border et al., 2019). For circulating TAC,  
248 samples were reported as  $\mu$ mol TE/dL of the sample. Absorbance was read by a plate reader  
249 (Spectramax M3, Molecular Devices, Sunnyvale, CA, USA).

250 *OXY-adsorbent Test (OXY):* For the OXY assay (Diacron, Grosseto, Italy), we diluted  
251 blood plasma (1:100) with distilled water using 2  $\mu$ L of diluted sample per well following the  
252 protocol as described previously (Dijkstra et al., 2016). Plasma OXY concentration was

253 expressed as  $\mu\text{mol}$  of  $\text{HClO}$ /mL of sample. Absorbance was read at 550 nm by a plate reader  
254 (Spectramax M3, Molecular Devices, Sunnyvale, CA, USA).

255 *Biological Antioxidant Potential Test (BAP)*: For the BAP assay (Diacron, Grosseto,  
256 Italy), we used 2  $\mu\text{L}$  of plasma for each well and followed the manufacturer instructions. Plasma  
257 BAP concentration was expressed as  $\mu\text{mol}$ /mL of sample. Absorbance was read at 505 nm by a  
258 plate reader (Spectramax M3, Molecular Devices, Sunnyvale, CA, USA).

259

#### 260 *2.5.5 Tissue Total Antioxidant Capacity (TAC)*

261 TAC was determined in tissue (liver, gonad, and muscle) following the same ORAC procedure  
262 as described for plasma with the following exceptions for all tissues. Tissues were removed from  
263  $-80^{\circ}\text{C}$  and homogenized on ice in 0.250 mL lysis buffer (20 mM Tris-HCl, 137 mM NaCl, 1%  
264 NP-40, 10% glycerol, 2 mM EDTA) using an Omni Tissue Master (Omni International,  
265 Kenosha, Wisconsin), then centrifuged at  $4^{\circ}\text{C}$  at 17,000g for 10 minutes. Supernatant was  
266 collected and used to run BCA and ORAC. For ORAC, protein concentrations were standardized  
267 to  $\sim 150$   $\mu\text{g}$ /mL and reported as  $\mu\text{mol TE}/\mu\text{g}$  protein. Absorbance was read by a plate reader  
268 (Spectramax M3, Molecular Devices, Sunnyvale, CA, USA).

269

#### 270 *2.5.6 Superoxide dismutase (SOD)*

271 SOD was measured using Water Soluble Tetrazolium Salts (WSTs) via a modified competitive  
272 assay (Peskin and Winterbourn 2000) in liver and gonads. Samples were taken from  $-80^{\circ}\text{C}$  and  
273 homogenized on ice in a PBS (pH 7.4, 75mM). Tissue homogenates were then centrifuged at 4  
274  $^{\circ}\text{C}$  at 10,000 g for 10 min. The supernatant was then transferred to a new tube and stored at  $-80$   
275  $^{\circ}\text{C}$  until used for analysis. Protein concentration was measured using BCA before preparing each

276 supernatant at multiple protein concentrations (liver: 0.375  $\mu\text{g}/\mu\text{L}$ , 0.25  $\mu\text{g}/\mu\text{L}$ , 0.125  $\mu\text{g}/\mu\text{L}$ , and  
277 0.05  $\mu\text{g}/\mu\text{L}$ ; gonads: 0.4  $\mu\text{g}/\mu\text{L}$ , 0.3  $\mu\text{g}/\mu\text{L}$ , 0.2  $\mu\text{g}/\mu\text{L}$ , and 0.1  $\mu\text{g}/\mu\text{L}$ ). SOD activity was  
278 measured as described previously (Fialkowski et al., 2021). The amount of SOD content was  
279 reported per  $\mu\text{g}$  of protein (one unit of SOD is defined as the amount of enzyme in 20  $\mu\text{L}$  of the  
280 sample solution that inhibits the reduction reaction of WST-1 with superoxide anion by 50%).  
281 Absorbance was read by a plate reader (Epoch2T, Biotech Instruments, Winooski, VT, USA).

282

### 283 *2.5.7 NADPH-Oxidase (NOX) activity*

284 NOX activity was measured in the liver and the gonads via a lucigenin-based  
285 chemiluminescence assay using a microplate luminometer (Fialkowski et al., 2021). Liver  
286 samples were taken from  $-80^{\circ}\text{C}$  and homogenized on ice in a Krebs-HEPES buffer. The  
287 homogenized samples (before centrifugation) were subjected to a freeze-thaw cycle to ensure  
288 total cell lysis. After thawing, samples were centrifuged at  $4^{\circ}\text{C}$  at 600g for 10 minutes and  
289 supernatant was transferred and stored at  $-80^{\circ}\text{C}$ . For gonad samples, the supernatant was  
290 subjected to an additional freeze-thaw cycle to ensure total cell lysis. For each sample, an aliquot  
291 of supernatant was used to run BCA. To measure NOX activity, samples containing 30  $\mu\text{g}$  (liver)  
292 or 15  $\mu\text{g}$  (gonad) of protein were placed in a solid black 96-well plate (Corning 3912), then the  
293 reaction was initiated out of direct light by the addition of buffer containing lucigenin and  
294 NADPH, with a final concentration of 5 $\mu\text{M}$  lucigenin and 100 $\mu\text{M}$  NADPH. The plate was kept  
295 covered for transport to luminometer (Tecan infinite F200 Pro, Tecan Life Sciences, Männedorf,  
296 Zürich, Switzerland) and readings of Relative Light Units (RLU) were taken every 2 minutes for  
297 20 minutes. The area under the curve was calculated for minutes 2-20, and the results were  
298 expressed as RLU per minute per  $\mu\text{g}$  protein after subtraction of background chemiluminescence.

299

### 300 *2.5.8 Oxidative DNA damage*

301 Oxidative DNA damage was evaluated for 8-OhDG damage using a DNA damage ELISA kit  
302 (StressMarq Biosciences Inc.) (Fialkowski et al., 2021). DNA was extracted from packed red  
303 blood cells (PRBCs) and frozen tissue samples (liver, gonad) using a commercially available  
304 DNA extraction kit (Zymo quick-DNA miniprep plus kit) as described previously. Extracted  
305 samples were stored at 4 °C until digestion. Samples were digested at a standardized  
306 concentration of ~200 ng/ul (PRBCs, gonad) or 400-500 ng/ul (liver) using a modified digest  
307 mix protocol by Quinlivan and Gregory (2008) and stored at -20 °C until use in DNA damage  
308 plate (Quinlivan and Gregory, 2008). Digested samples were tested for 8-OhDG damage using a  
309 DNA damage ELISA kit at 12x dilution for blood and gonad samples and a 10x dilution for liver  
310 samples, with all samples run in duplicate following the manufacturer's instructions. Absorbance  
311 was measured using a microplate reader (Epoch2T, Biotech Instruments, Winooski, VT, USA).  
312 8-OhDG concentration was standardized relative to total DNA concentration and reported in  
313 ng/μL.

314

### 315 *2.5.9 Testosterone levels*

316 To confirm that dominant males upregulated their reproductive system, we quantified circulating  
317 testosterone levels using competitive ELISA kits (Enzo Life Sciences) as previously described  
318 (Border et al., 2019). Absorbance was read by a plate reader (Epoch2T, Biotech Instruments,  
319 Winooski, VT, USA).

320

### 321 *2.6 Statistical analysis*

322 We calculated a dominance index score for each weekly 5-minute focal observation as the sum  
323 of (aggressive behavior + reproductive behaviors) – fleeing events per min, as done previously in  
324 *A. burtoni* (Maruska et al., 2013). Gonadosomatic index (GSI) was calculated as (gonad  
325 weight/total body weight)\*100. Specific growth rate was expressed as the daily percentage  
326 weight change from the beginning to the end of the experiment relative to the initial weight  
327 (calculated as  $[\ln(\text{body weight}_{\text{final}}) - \ln(\text{body weight}_{\text{initial}})] \times 100/\text{days}$ ) (Ricker, 1975). Since  
328 males that were initially smaller grew more during the experiment, we calculated the residuals of  
329 specific growth rate using a linear regression and used this as our growth variable in the analysis.

330 All analyses were conducted in R v3.4.3. We analyzed our data using the R packages  
331 lme4, lmerTest, MASS (Bates et al., 2015), and glmmTMB (Brooks et al., 2017). We identified  
332 and excluded outliers based on Tukey’s rule (between 0 and 2 values were excluded per  
333 measurement). In addition, samples size for oxidative stress measurements varied depending on  
334 availability of tissue or technical constraints (Table 1). We used linear mixed models (LMMs)  
335 with a maximum-likelihood protocol. For count and proportional data, we used generalized  
336 linear mixed models (GLMMs). In each model, we used ‘pair code’ as random effect to account  
337 for fish that were housed in the same group. To evaluate the validity of our LMM and GLMM  
338 models, we examined the residuals, qqplots, and plots of predicted values versus residuals. We  
339 report mean  $\pm$  SE for our model estimates.

340

#### 341 *2.6.2 Analysis of behavior, GSI, and testosterone.*

342 To confirm the assigned social status of each male, we compared behavior, GSI, and testosterone  
343 levels between dominant and subordinate males. We tested for differences between social states  
344 in dominance index using a LMM. Shoaling duration was analyzed using a GLMM assuming a

345 Gaussian distribution with log link function and foraging bouts were analyzed using GLMM  
346 assuming a negative binomial distribution. In addition to ‘pair code’, we used ‘fish code’ nested  
347 within ‘pair code’ as random effect to account for the 4 weekly measurements of behavior for  
348 each focal male. GSI was analyzed using a LMM and testosterone levels were analyzed using a  
349 GLMM assuming a Gaussian distribution with log link function.

350

### 351 *2.6.3 Analysis of oxidative stress*

352 Measurements of oxidative stress were compared between dominant and subordinate males using  
353 LMMs. To examine whether covariance patterns across the different oxidative stress  
354 measurements varied by social status, we created clustered correlation matrices for dominant and  
355 subordinate males separately. We then carried out a hierarchical cluster analysis to identify  
356 clusters of oxidative stress measurements that were coregulated. We obtained *P*-values using  
357 multiscale bootstrap resampling from the pvclust package (Suzuki and Shimodaira, 2006). Since  
358 growth rate and investment in territorial defense and reproduction could influence oxidative  
359 state, we also carried out the same hierarchical cluster analysis after adding GSI, specific growth  
360 rate, dominance index (based on the final five-minute focal observation, closest to tissue  
361 sampling) and testosterone to the oxidative stress dataset.

362

## 363 **3. Results**

364

### 365 *3.1 Males become dominant or subordinate*

366 Males did not change social status a during the entire duration of the experiment (Fig. 1A). The  
367 dominance index (the difference between aggressive behavior and fleeing events) was



368 significantly higher in dominant males (LMM,  $-12.6871 \pm 0.4730$ ,  $t_{62} = -26.82$ ,  $P < 0.00001$ ).  
369 Subordinate males spent more time shoaling than dominant males (GLMM,  $2.59 \pm 0.50$ ,  $z = 5.19$ ,  
370  $P < 0.00001$ ). Social dominance was linked to more reproductive behavior, with dominant males  
371 showing more courtship behavior than subordinate males (GLMM, zero-inflation model,  
372  $3.27 \pm 0.61$ ,  $z = 5.34$ ,  $P < 0.00001$ ). We observed mouthbrooding females in all groups during the  
373 entire duration of the experiment, suggesting that all dominant males spawned (females typically  
374 spawn with dominant males, PDD pers. obs.).

375 Dominant males had higher gonadosomatic index (LMM,  $-0.125 \pm 0.050$ ,  $t_{31} = -2$ ,  
376  $P = 0.0189$ ) and circulating testosterone levels (GLMM,  $-0.595 \pm 0.102$ ,  $z = -5.85$ ,  $P < 0.00001$ ) than  
377 subordinate males, confirming that the former had an activated reproductive system (Fig. 1B).  
378 Finally, dominant males grew faster than subordinate males (specific growth rate, dominant  
379 males:  $1.044 \pm 0.067$ , subordinate males:  $1.019 \pm 0.063$ ) and after correcting for the effect of initial  
380 body weight this effect of social status on growth rate was significant (LMM,  $-0.196 \pm 0.067$ ,  $t_{31} = -$   
381  $2.94$ ,  $P = 0.006$ ).

382

### 383 *3.2 Dominant males experienced greater circulating oxidative damage than subordinate males*

384 We compared a total of 14 oxidative stress measures between dominant and subordinate males  
385 (Fig. 2, Table 1). Plasma reactive oxygen metabolites (ROMs), a marker of overall oxidative  
386 damage, was higher in dominant males than in subordinate males (Table 1), consistent with  
387 previous findings in the same species (Border et al., 2019; Fialkowski et al., 2021). Dominant  
388 males displayed higher NOX activity in the gonads and liver, although this effect was only  
389 significant in the gonads (Table 1). There were no significant status differences in the other  
390 measurements of oxidative stress (Table 1).

391

392 *3.3 Dominant males express greater covariance patterns of oxidative stress profile than*

393 *subordinate males*

394 We tested whether dominant and subordinate males vary in co-variance patterns across the  
395 different markers of oxidative stress and tissue types by examining clustered correlation matrices  
396 for dominant and subordinate males separately (Fig. 3A). In dominant males, significant clusters  
397 included both antioxidant function and oxidative damage across multiple tissue types while in  
398 subordinate males only one plasma antioxidant cluster was significant. Specifically, there were  
399 three significant clusters in dominant males, one involving plasma BAP, liver TAC, and gonad  
400 SOD, a second cluster involving muscle TAC and liver SOD, and a third cluster comprised of the  
401 remaining variables (all  $P < 0.05$ ). By contrast, there was only one small cluster that was  
402 significant in subordinate males comprised of plasma BAP and plasma OXY ( $P < 0.05$ ).

403         Given that investment in growth, social dominance, and reproduction may be linked to  
404 oxidative stress, we also tested for co-variance patterns in oxidative stress datasets that included  
405 GSI, specific growth rate, testosterone, and dominance index. This analysis revealed two  
406 significant clusters in dominant males versus only one in subordinate males (Fig. 3, all  $P < 0.05$ ).  
407 Similar to the analysis that only included measurements of oxidative stress, there were more  
408 clusters in dominant males than subordinate males. Clusters in dominant males included both  
409 antioxidant function and oxidative damage across tissue types, supporting that social dominance  
410 is causally linked to a higher degree of functional integration of oxidative state.

411

412 **4. Discussion**

413 We found clear dominance hierarchies with dominant males having upregulated GSI and higher  
414 testosterone levels than subordinate males. However, we found limited evidence that dominant  
415 males had higher levels of oxidative stress than subordinate males when comparing independent  
416 oxidative stress measurements. Importantly, there were more significant clusters of coregulated  
417 oxidative stress variables in dominant males than in subordinate males, suggesting that dominant  
418 males have more efficient or more active regulation of oxidative balance than subordinate males.  
419 Below, we discuss these findings in more detail.

420

#### 421 *4.1 Limited cost of social dominance when markers are evaluated in isolation*

422 Our findings suggest that social status-specific differences in oxidative balance is highly tissue-  
423 and marker-specific. Organisms are comprised of a complex set of integrated organs performing  
424 unique functions. As a result, energetically demanding activities such as reproduction and  
425 defending high rank likely affect parts of the body differently (Costantini, 2019; Speakman and  
426 Garratt, 2014). It is therefore unsurprising that reproduction may elevate, reduce, or have no  
427 impact on oxidative damage and/or antioxidant function depending on which macromolecules  
428 and tissues are considered, which our findings here support (Garratt et al., 2011; Garratt et al.,  
429 2013; Ołdakowski et al., 2015; Yang et al., 2013). However, it was surprising that when  
430 comparing markers of oxidative stress in isolation, dominant and subordinate males only differed  
431 in two measurements of oxidative stress. We also note that increased NOX activity in the gonads  
432 of dominant males is consistent with higher NOX signaling in mature sperm, which does not  
433 necessarily constitute a ‘cost’ given the important role of redox signaling in sperm function  
434 (Tremellen, 2012). Furthermore, there was no social status effect on oxidative DNA damage,  
435 even though we measured it in three different tissue types.

436           There are several explanations for the limited status-dependent differences in oxidative  
437 stress, including the ability to effectively manage or minimize oxidative stress and the fact that  
438 our animals were housed under benign lab conditions. Since oxidative stress is an ever present  
439 problem, organisms have evolved multi-faceted highly-regulated cytoprotective mechanisms to  
440 mitigate oxidative damage (Balaban et al., 2005). We recently induced social status transition  
441 from subordinate to dominant position in *A. burtoni* and found that social ascent was associated  
442 with dynamic changes in plasma ROMs, plasma TAC, liver TAC and liver SOD activity  
443 (Fialkowski et al., 2021). Specifically, plasma TAC was rapidly depleted while liver SOD and  
444 liver TAC were increased during social ascent. However, after 2 weeks of social dominance,  
445 dominant males did not have different levels of liver SOD or TAC and had higher plasma ROMs  
446 than subordinate males, consistent with the current study.

447           The fact that in the current study we did not detect social status differences in oxidative  
448 balance in most tissue types could be due to a limited cost of social dominance when the  
449 hierarchy is stable (for a study comparing stable hierarchies and social ascension in another  
450 cichlid species, see (Culbert et al., 2022)). Our findings are consistent with the notion that  
451 animals undergo behavioral and physiological adjustments to cope with demanding life history  
452 activities. For example, the onset of reproduction is often associated with dramatic metabolic and  
453 morphological remodeling to cope with the energetic demands of reproduction (Reiff et al.,  
454 2015) and these changes may also involve upregulated antioxidant defense (Blount et al., 2016).  
455 Further, our experiments were carried out in captivity under benign conditions providing ad  
456 libitum food and protection. It is possible that the cost of social dominance is more pronounced  
457 when dominant individuals face additional challenges, such as parental care, food shortage,  
458 temperature stress, parasites, or social instability (Speakman et al., 2015). For example, in the

459 white-browed sparrow weaver (*Plocepasser mahali*), highly ranked females but not highly  
460 ranked males experienced increased oxidative stress after breeding, presumable due to the fact  
461 that females exert more effort during reproduction in relation to egg laying, incubation and egg  
462 provisioning (Cram et al., 2015).

463

#### 464 *4.2 Social status differences in integration of oxidative stress components*

465 Social status predicted the extent of functional integration across different components of  
466 oxidative stress. Across all 14 measurements of oxidative stress (i.e. all markers and tissue  
467 types), we observed three significant co-regulated clusters in dominant males and only one  
468 cluster in subordinate males. In dominant males, all oxidative stress variables were part of one of  
469 these clusters. In addition, in dominant males all clusters contained variables from different  
470 tissue types, in contrast to the situation in subordinate males (in the latter, plasma BAP and  
471 plasma OXY formed a cluster, which is not surprising given that both measure overlapping  
472 components of antioxidant capacity in blood). Further, in dominant males there was coregulation  
473 between different measurements within the same tissue as well as the same measurement across  
474 different tissue. It was particularly interesting to note that all oxidative DNA damage  
475 measurements were included in this cluster. The other two smaller clusters in dominant males  
476 linked different measures of antioxidant function (TAC and SOD) across different tissue types,  
477 both containing measures in liver linked to either gonads or muscle. It is difficult to interpret the  
478 functional significance of these smaller clusters in dominant males, but they suggest a relatively  
479 high level of coordination between different components of the antioxidant defense system  
480 across completely different organs.

481           The more modular redox responses in dominant males relative to subordinate males could  
482 be an indication of a more efficient and/or active management of oxidative balance. This finding  
483 suggests that dominant males pay a reduced cost to maintaining oxidative balance due to more  
484 effective neutralization of oxidative insults by antioxidant defense systems or dominant males  
485 benefiting from a more robust, stable system guarding oxidative balance relative to subordinate  
486 males. The lack of modularity in subordinate males could suggest that social subordination is  
487 associated with increased dysregulation of oxidative balance, and perhaps increased (and costly)  
488 investment into maintaining redox balance. This notion that a low level of integration reflects an  
489 oxidative cost is consistent with lower integration of antioxidant parameters observed in  
490 hybridizing newts as a cost of interspecific hybridization (Prokić et al., 2018) and exercise-  
491 induced loss of integration in zebra finches (Costantini et al., 2013). It is also supported by  
492 proteomic and metabolomic studies suggesting that the degree of integration or connectivity in  
493 metabolic networks may reveal information about the robustness or efficiency of systems that  
494 maintain stability and homeostasis. Integration of these systems may decline with age due to  
495 failure in communication between interacting units (Hoffman et al., 2017).

496           However, increased modularity observed in dominant males may also entail costs. More  
497 integration may be a manifestation of more active management of oxidative balance. Although  
498 the relative energetic cost of upregulating antioxidant enzymes is probably low, active regulation  
499 of redox balance is not cost-free due to 'physiological constraints' or pleiotropic effects of  
500 activating antioxidant response systems (Pamplona and Costantini, 2011). For example, in  
501 addition to being a damaging by-product, ROS also have important cell signaling functions, and  
502 mounting an antioxidant response could also quench ROS that have beneficial effects (Linnane  
503 et al., 2007). Consequently, upregulation of antioxidant enzymes may lead to detrimental side

504 effects (Barajas et al., 2011). The interpretation of increased integration of oxidative stress in  
505 dominant males relative to the oxidative cost of social dominance/reproduction is complicated,  
506 and future studies should shed more light on functional significance of variation in integration in  
507 the context of life history trade-offs. Specifically, to what extent does the degree of integration  
508 reflect robustness and efficiency of interacting systems that maintain redox homeostasis? How is  
509 the relationship between integration and robustness/efficiency modulated by the type, duration,  
510 and magnitude of stressors associated with social dominance and reproduction? And based on  
511 this information on the link between integration and efficiency/activation of the system, what are  
512 the long-term fitness consequences? These are interesting questions that are not always easy to  
513 tackle (e.g. addressing some of these questions requires longitudinal sampling of the same  
514 individuals, which is challenging unless non-invasive sampling techniques are used (Alonso-  
515 Alvarez et al., 2017)) but may prove useful in future studies.

516         To conclude, we found that dominant *A. burtoni* males experienced more oxidative stress  
517 in only two oxidative stress markers (plasma ROMs and gonad NOX activity) out of a total of 14  
518 different oxidative stress measurements. We found evidence for more integrated redox  
519 regulation, and hence more active or efficient management of oxidative balance in dominant  
520 males. Whether this supports the oxidative cost of social dominance remains to be tested in  
521 future studies. We propose that studies on the oxidative cost of demanding life history events  
522 more generally (e.g. migration: (Eikenaar et al., 2020); parental care: (Guindre-Parker and  
523 Rubenstein, 2018)) should include analyses of how different components of oxidative stress are  
524 interconnected. Even in the absence of difference in mean values in redox markers between for  
525 examples breeders and nonbreeders, there might be differences in correlation structure that could  
526 provide important insights into the role of oxidative stress as a mediator of life history trade-offs.

527

## 528 **Funding**

529 This research was supported by the Earth and Ecosystem Science doctoral program at Central  
530 Michigan University to RJF and a graduate student grant from the Office of Research and  
531 Graduate Studies at Central Michigan University to Shana Border.

## 532 **Author's contributions**

533 Authors PD and SB contributed to the conception and design of the experiment. RF, SB, and PD  
534 contributed material preparation and data collection with IB performing behavioral coding. The  
535 first draft of the manuscript was written by PD and all authors commented on previous versions  
536 of the manuscript. All authors read and approved the final manuscript.

## 537 **Ethics approval**

538 All procedures were approved by the Institutional Animal Care and Use Committee (IACUC,  
539 protocols #15-22 and #18-10) prior to conducting the experiment. All applicable international,  
540 national, and/or institutional guidelines for the use of animals were followed.

## 541 **Declaration of competing interests**

542 The authors declare no competing interests.

## 543 **Acknowledgements**

544 We thank Ross DeAngelis and members of the Dijkstra lab for providing helpful comments to  
545 earlier drafts of the manuscript. We would also like to thank Hannah Janeski for technical  
546 assistance. Deric Learman and Benjamin Swarts are thanked for allowing us to use the plate  
547 readers in their lab. Travis Moore assisted us with the behavioral analysis.

548

## 549 **References**

550 **Alonso-Alvarez, C., Canelo, T. and Romero-Haro, A. Á.** (2017). The oxidative cost of  
551 reproduction: Theoretical questions and alternative mechanisms. *Bioscience* **67**, 258–270.



- 552 **Alward, B. A., Laud, V. A., Skalnik, C. J., York, R. A., Juntti, S. A. and Fernald, R. D.**  
553 (2020). Modular genetic control of social status in a cichlid fish. *Proc. Natl. Acad. Sci. U. S.*  
554 *A.* **117**, 28167–28174.
- 555 **Archer, C. R., Sakaluk, S. K., Selman, C., Royle, N. J. and Hunt, J.** (2013). Oxidative stress  
556 and the evolution of sex differences in life span and ageing in the decorated cricket,  
557 *Gryllobates sigillatus*. *Evolution (N. Y.)* **67**, 620–634.
- 558 **Balaban, R. S., Nemoto, S. and Finkel, T.** (2005). Mitochondria, oxidants, and aging. *Cell* **120**,  
559 483–95.
- 560 **Barajas, B., Che, N., Yin, F., Rowshanrad, A., Orozco, L. D., Gong, K. W., Wang, X.,**  
561 **Castellani, L. W., Reue, K., Lusic, A. J., et al.** (2011). NF-E2-related factor 2 promotes  
562 atherosclerosis by effects on plasma lipoproteins and cholesterol transport that overshadow  
563 antioxidant protection. *Arterioscler. Thromb. Vasc. Biol.* **31**, 58–66.
- 564 **Bates, D., Mächler, M., Bolker, B. and Walker, S.** (2015). Fitting linear mixed-effects models  
565 using lme4. *J. Stat. Softw.* **67**,.
- 566 **Beaulieu, M., Mboumba, S., Willaume, E., Kappeler, P. M. and Charpentier, M. J. E.**  
567 (2014). The oxidative cost of unstable social dominance. *J. Exp. Biol.* **217**, 2629–32.
- 568 **Bedard, K. and Krause, K. H.** (2007). The NOX family of ROS-generating NADPH oxidases:  
569 Physiology and pathophysiology. *Physiol. Rev.* **87**, 245–313.
- 570 **Bize, P., Devevey, G., Monaghan, P., Doligez, B. and Bize, P.** (2008). Fecundity and survival  
571 in relation to resistance to oxidative stress in a free-living bird. *Ecology* **89**, 2584–2593.
- 572 **Blount, J. D., Vitikainen, E. I. K., Stott, I. and Cant, M. A.** (2016). Oxidative shielding and  
573 the cost of reproduction. *Biol. Rev.* **91**, 483–497.
- 574 **Border, S. E., Piefke, T. J., Fialkowski, R. J., Tryc, M. R., Funnell, T. R., Deoliveira, G. M.**  
575 **and Dijkstra, P. D.** (2018). Color change and pigmentation in a color polymorphic cichlid  
576 fish. *Hydrobiologia* **832**, 175–191.
- 577 **Border, S. E., Deoliveira, G. M., Janeski, H. M., Piefke, T. J., Brown, T. J. and Dijkstra, P.**  
578 **D.** (2019). Social rank, color morph, and social network metrics predict oxidative stress in  
579 a cichlid fish. *Behav. Ecol.* **30**, 490–499.
- 580 **Border, S. E., Piefke, T. J., Funnell, T. R., Fialkowski, R. F., Sawecki, J. and Dijkstra, P. D.**  
581 (2021). Social instability influences rank-specific patterns of oxidative stress in a cichlid  
582 fish. *J. Exp. Biol.* **224**,.
- 583 **Brooks, M. E., Kristensen, K., van Benthem, K. J., Magnusson, A., Berg, C. W., Nielsen, A.,**  
584 **Skaug, H. J., Mächler, M. and Bolker, B. M.** (2017). glmmTMB balances speed and  
585 flexibility among packages for zero-inflated generalized linear mixed modeling. *R J.* **9**,  
586 378–400.
- 587 **Christe, P., Glaizot, O., Strepparava, N., Devevey, G. and Fumagalli, L.** (2012). Twofold  
588 cost of reproduction: An increase in parental effort leads to higher malarial parasitaemia and  
589 to a decrease in resistance to oxidative stress. *Proc. R. Soc. B Biol. Sci.* **279**, 1142–1149.
- 590 **Costantini, D.** (2016). Oxidative stress ecology and the d-ROMs test: facts, misfacts and an  
591 appraisal of a decade's work. *Behav. Ecol. Sociobiol.* **70**, 809–820.
- 592 **Costantini, D.** (2019). Understanding diversity in oxidative status and oxidative stress: The  
593 opportunities and challenges ahead. *J. Exp. Biol.* **222**,.
- 594 **Costantini, D., Monaghan, P. and Metcalfe, N. B.** (2011). Biochemical integration of blood  
595 redox state in captive zebra finches (*Taeniopygia guttata*). *J. Exp. Biol.* **214**, 1148–52.
- 596 **Costantini, D., Monaghan, P. and Metcalfe, N. B.** (2013). Loss of integration is associated  
597 with reduced resistance to oxidative stress. *J. Exp. Biol.* **216**, 2213–20.

- 598 **Costantini, D., Casasole, G. and Eens, M.** (2014). Does reproduction protect against oxidative  
599 stress? *J. Exp. Biol.* **217**, 4237–4243.
- 600 **Cram, D. L., Blount, J. D. and Young, A. J.** (2015). Oxidative status and social dominance in a  
601 wild cooperative breeder. *Funct. Ecol.* **29**, 229–238.
- 602 **Culbert, B. M., Dijkstra, P. D., Gilmour, K. M. and Balshine, S.** (2022). Antioxidant capacity  
603 differs across social ranks and with ascension in males of a group-living fish. *Comp.*  
604 *Biochem. Physiol. -Part A Mol. Integr. Physiol.* **265**, 111126.
- 605 **Dijkstra, P. D., Wiegertjes, G. F., Forlenza, M., van der Sluijs, I., Hofmann, H. A.,**  
606 **Metcalf, N. B. and Groothuis, T. G. G.** (2011). The role of physiology in the divergence  
607 of two incipient cichlid species. *J. Evol. Biol.* **24**, 2639–52.
- 608 **Dijkstra, P. D., Pierotti, M. E. R., Seehausen, O. and Metcalfe, N. B.** (2016). Metabolism,  
609 oxidative stress and territorial behaviour in a female colour polymorphic cichlid fish. *Behav.*  
610 *Ecol. Sociobiol.* **70**, 99–109.
- 611 **Dowling, D. K. and Simmons, L. W.** (2009). Reactive oxygen species as universal constraints  
612 in life-history evolution. *Proc. Biol. Sci.* **276**, 1737–45.
- 613 **Eikenaar, C., Winslott, E., Hessler, S. and Isaksson, C.** (2020). Oxidative damage to lipids is  
614 rapidly reduced during migratory stopovers. *Funct. Ecol.* **34**, 1215–1222.
- 615 **Enomoto, A., Itoh, K., Nagayoshi, E., Haruta, J., Kimura, T., O'Connor, T., Harada, T.**  
616 **and Yamamoto, M.** (2001). High Sensitivity of Nrf2 Knockout Mice to Acetaminophen  
617 Hepatotoxicity Associated with Decreased Expression of ARE-Regulated Drug  
618 Metabolizing Enzymes and Antioxidant Genes. *Toxicol. Sci.* **59**, 169–177.
- 619 **Fernald, R. D.** (2017). Cognitive skills and the evolution of social systems. *J. Exp. Biol.* **220**,  
620 103–113.
- 621 **Fialkowski, R., Aufdemberge, P., Wright, V. and Dijkstra, P.** (2021). Radical change:  
622 temporal patterns of oxidative stress during social ascent in a dominance hierarchy. *Behav.*  
623 *Ecol. Sociobiol.* **75**, 43.
- 624 **Friard, O. and Gamba, M.** (2016). BORIS: a free, versatile open-source event-logging software  
625 for video/audio coding and live observations. *Methods Ecol. Evol.* **7**, 1325–1330.
- 626 **Garratt, M., Vasilaki, A., Stockley, P., McArdle, F., Jackson, M. and Hurst, J. L.** (2011). Is  
627 oxidative stress a physiological cost of reproduction? An experimental test in house mice.  
628 *Proc. R. Soc. B Biol. Sci.* **278**, 1098–1106.
- 629 **Garratt, M., Pichaud, N., King, E. D. A. and Brooks, R. C.** (2013). Physiological adaptations  
630 to reproduction. I. Experimentally increasing litter size enhances aspects of antioxidant  
631 defence but does not cause oxidative damage in mice. *J. Exp. Biol.* **216**, 2879–2888.
- 632 **Guindre-Parker, S. and Rubenstein, D. R.** (2018). No short-term physiological costs of  
633 offspring care in a cooperatively breeding bird. *J. Exp. Biol.* **221**,.
- 634 **Hoffman, J. M., Lyu, Y., Pletcher, S. D. and Promislow, D. E. L.** (2017). Proteomics and  
635 metabolomics in ageing research: from biomarkers to systems biology. *Essays Biochem.* **61**,  
636 379–388.
- 637 **Hörak, P. and Cohen, A.** (2010). How to measure oxidative stress in an ecological context:  
638 Methodological and statistical issues. *Funct. Ecol.* **24**, 960–970.
- 639 **Linnane, A. W., Kios, M. and Vitetta, L.** (2007). Healthy aging: Regulation of the metabolome  
640 by cellular redox modulation and prooxidant signaling systems: The essential roles of  
641 superoxide anion and hydrogen peroxide. *Biogerontology* **8**, 445–467.
- 642 **Marrocco, I., Altieri, F. and Peluso, I.** (2017). Measurement and clinical significance of  
643 biomarkers of oxidative stress in humans. *Oxid. Med. Cell. Longev.* **2017**,.

- 644 **Maruska, K. P., Becker, L., Neboori, a. and Fernald, R. D.** (2013). Social descent with  
645 territory loss causes rapid behavioral, endocrine and transcriptional changes in the brain. *J.*  
646 *Exp. Biol.* **216**, 3656–3666.
- 647 **Monaghan, P., Metcalfe, N. B. and Torres, R.** (2009). Oxidative stress as a mediator of life  
648 history trade-offs: mechanisms, measurements and interpretation. *Ecol. Lett.* **12**, 75–92.
- 649 **Noguera, J. C.** (2019). Crickets increase sexual signalling and sperm protection but live shorter  
650 in the presence of rivals. *J. Evol. Biol.* **32**, 49–57.
- 651 **O’Connell, L. A. and Hofmann, H. A.** (2012). Social status predicts how sex steroid receptors  
652 regulate complex behavior across levels of biological organization. *Endocrinology* **153**,  
653 1341–51.
- 654 **Oldakowski, L., Wasiluk, A., Sadowska, E. T., Koteja, P. and Taylor, J. R. E.** (2015).  
655 Reproduction is not costly in terms of oxidative stress. *J. Exp. Biol.* **218**, 3901–3910.
- 656 **Pamplona, R. and Costantini, D.** (2011). Molecular and structural antioxidant defenses against  
657 oxidative stress in animals. *Am. J. Physiol. - Regul. Integr. Comp. Physiol.* **301**,.
- 658 **Piefke, T. J., Bonnell, T. R., DeOliveira, G. M., Border, S. E. and Dijkstra, P. D.** (2021).  
659 Social network stability is impacted by removing a dominant male in replicate dominance  
660 hierarchies of a cichlid fish. *Anim. Behav.* **175**, 7–20.
- 661 **Prokić, M. D., Despotović, S. G., Vučić, T. Z., Petrović, T. G., Gavrić, J. P., Gavrilović, B.**  
662 **R., Radovanović, T. B. and Saičić, Z. S.** (2018). Oxidative cost of interspecific  
663 hybridization: A case study of two *Triturus* species and their hybrids. *J. Exp. Biol.* **221**, 1–7.
- 664 **Quinlivan, E. P. and Gregory, J. F.** (2008). DNA digestion to deoxyribonucleoside: A  
665 simplified one-step procedure. *Anal. Biochem.* **373**, 383–385.
- 666 **Reiff, T., Jacobson, J., Cognigni, P., Antonello, Z., Ballesta, E., Tan, K. J., Yew, J. Y.,**  
667 **Dominguez, M. and Miguel-Aliaga, I.** (2015). Endocrine remodelling of the adult intestine  
668 sustains reproduction in drosophila. *Elife* **4**,.
- 669 **Ricker, W.** (1975). Computation and interpretation of biological statistics of fish populations.  
670 *Bull. Fish. Res. Board Canada* **191**, 1–382.
- 671 **Sawecki, J., Miros, E., Border, S. E. and Dijkstra, P. D.** (2019). Reproduction and maternal  
672 care increase oxidative stress in a mouthbrooding cichlid fish. *Behav. Ecol.*
- 673 **Selman, C., McLaren, J. S., Meyer, C., Duncan, J. S., Redman, P., Collins, A. R., Duthie, G.**  
674 **G. and Speakman, J. R.** (2006). Life-long vitamin C supplementation in combination with  
675 cold exposure does not affect oxidative damage or lifespan in mice, but decreases  
676 expression of antioxidant protection genes. *Mech. Ageing Dev.* **127**, 897–904.
- 677 **Sharick, J. T., Vazquez-Medina, J. P., Ortiz, R. M. and Crocker, D. E.** (2015). Oxidative  
678 stress is a potential cost of breeding in male and female northern elephant seals. *Funct.*  
679 *Ecol.* **29**, 367–376.
- 680 **Silva, L. R., Lardy, S., Ferreira, A. C., Rey, B., Doutrelant, C. and Covas, R.** (2018).  
681 Females pay the oxidative cost of dominance in a highly social bird. *Anim. Behav.* **144**,  
682 135–146.
- 683 **Speakman, J. R. and Garratt, M.** (2014). Oxidative stress as a cost of reproduction: Beyond  
684 the simplistic trade-off model. *BioEssays* **36**, 93–106.
- 685 **Speakman, J. R., Blount, J. D., Bronikowski, A. M., Buffenstein, R., Isaksson, C.,**  
686 **Kirkwood, T. B. L., Monaghan, P., Ozanne, S. E., Beaulieu, M., Briga, M., et al.**  
687 (2015). Oxidative stress and life histories: Unresolved issues and current needs. *Ecol. Evol.*  
688 **5**, 5745–5757.
- 689 **Stier, A., Reichert, S., Massemin, S., Bize, P. and Criscuolo, F.** (2012). Constraint and cost of

690 oxidative stress on reproduction: Correlative evidence in laboratory mice and review of the  
691 literature. *Front. Zool.* **9**,.  
692 **Suzuki, R. and Shimodaira, H.** (2006). Pvclust: An R package for assessing the uncertainty in  
693 hierarchical clustering. *Bioinformatics* **22**, 1540–1542.  
694 **Tremellen, K.** (2012). Oxidative stress and male infertility: A clinical perspective. *Stud. Men's*  
695 *Heal. Fertil.* **14**, 325–353.  
696 **van de Crommenacker, J., Komdeur, J. and Richardson, D. S.** (2011). Assessing the cost of  
697 helping: The roles of body condition and oxidative balance in the seychelles warbler  
698 (acrocephalus sechellensis). *PLoS One* **6**,.  
699 **Yang, D. B., Xu, Y. C., Wang, D. H. and Speakman, J. R.** (2013). Effects of reproduction on  
700 immuno-suppression and oxidative damage, and hence support or otherwise for their roles  
701 as mechanisms underpinning life history trade-offs, are tissue and assay dependent. *J. Exp.*  
702 *Biol.* **216**, 4242–4250.  
703  
704

705 **Tables**

706

707 Table 1. Statistical results comparing measurements of oxidative stress between dominant and subordinate males. Significant effects  
708 are shown in bold.

709

| 710 <b>Marker</b>    | <b>Estimate</b> | <b>df</b> | <b>t value</b> | <b>P value</b>   | <b>Sample sizes</b> |                    |
|----------------------|-----------------|-----------|----------------|------------------|---------------------|--------------------|
|                      |                 |           |                |                  | <b>Dominant</b>     | <b>Subordinate</b> |
| 711 Plasma ROMs      | -0.603±0.191    | 26.46     | -3.167         | <b>0.00385**</b> | 29                  | 29                 |
| 712 Plasma TAC       | -95.52±62.03    | 58.00     | -1.54          | 0.129            | 28                  | 30                 |
| 713 Plasma OXY       | -35.24±42.13    | 38.00     | -0.836         | 0.408            | 19                  | 19                 |
| 714 Plasma BAP       | -1812.9±1083.6  | 26.0      | -1.673         | 0.106            | 13                  | 13                 |
| 715 Liver TAC        | 0.005±0.068     | 31.00     | 0.07           | 0.944            | 31                  | 31                 |
| 716 Gonad TAC        | -0.058±0.051    | 30.28     | -1.151         | 0.259            | 31                  | 30                 |
| 717 Muscle TAC       | 0.069±0.068     | 61.00     | 1.021          | 0.311            | 30                  | 31                 |
| 718 Blood DNA damage | 0.011±0.011     | 0.25      | 1.008          | 0.323            | 29                  | 28                 |
| 719 Liver DNA damage | -0.0034±0.0060  | 0.18      | -0.565         | 0.579            | 26                  | 19                 |
| 720 Gonad DNA damage | -0.0135±0.011   | 0.27      | -1.246         | 0.223            | 29                  | 26                 |
| 721 Liver NOX        | -4.36±2.48      | 28.88     | -1.755         | 0.0899           | 29                  | 29                 |
| 722 Gonad NOX        | -6.68±3.05      | 30.96     | -2.19          | <b>0.0362*</b>   | 30                  | 30                 |
| 723 Liver SOD        | -0.011±0.036    | 49.00     | -0.313         | 0.755            | 26                  | 23                 |
| 724 Gonad SOD        | -0.023±0.029    | 27.40     | -0.79          | 0.436            | 27                  | 20                 |

725

726

727

728 **Figures**

729

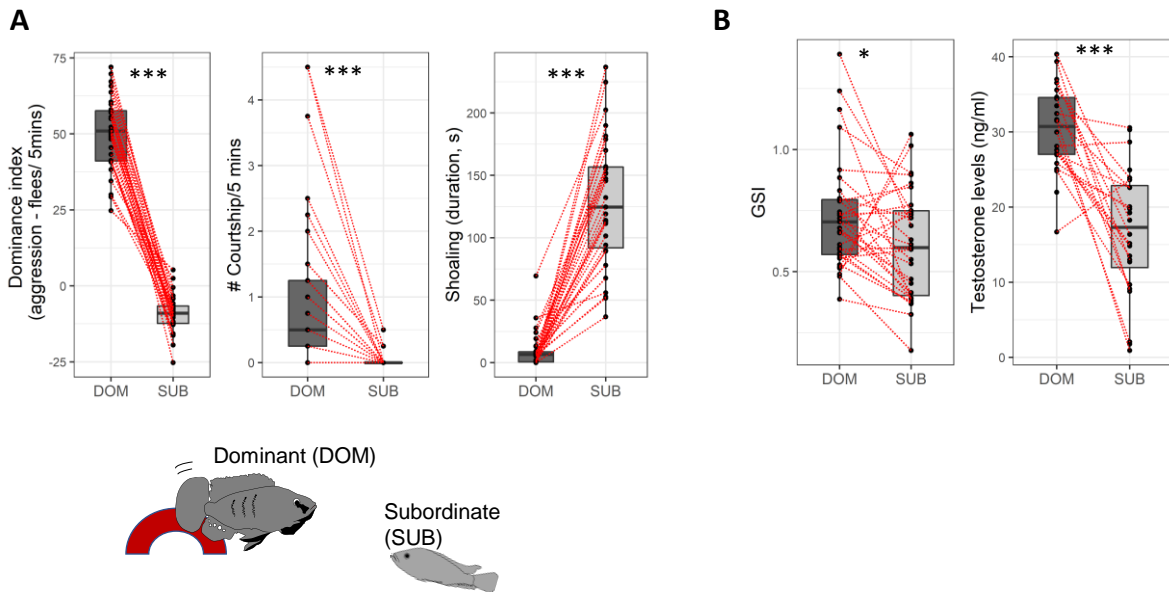

730 **Fig. 1.** Levels of behavior, testosterone, and gonadosomatic index by social status. (A) Dominant  
731 males show more aggressive and courtship behaviors while subordinate males show more  
732 subordinate behaviors such as fleeing and shoaling during four weekly observations. Shown are  
733 the rates (dominant index per minute, courtship per 5 minutes, shoaling amount of time spent)  
734 averaged across the final four weeks prior to tissue sampling. (B) Dominant males also had  
735 higher gonadal somatic index (GSI) and higher circulating testosterone levels than subordinate  
736 males. Bold lines indicate medians. Boxes enclose 25th to 75th percentiles. Error bars enclose  
737 data range, excluding outliers. Dots are data points and red lines connect data for males that were  
738 housed together. \*  $P < 0.05$ , \*\*\*  $P < 0.001$

739

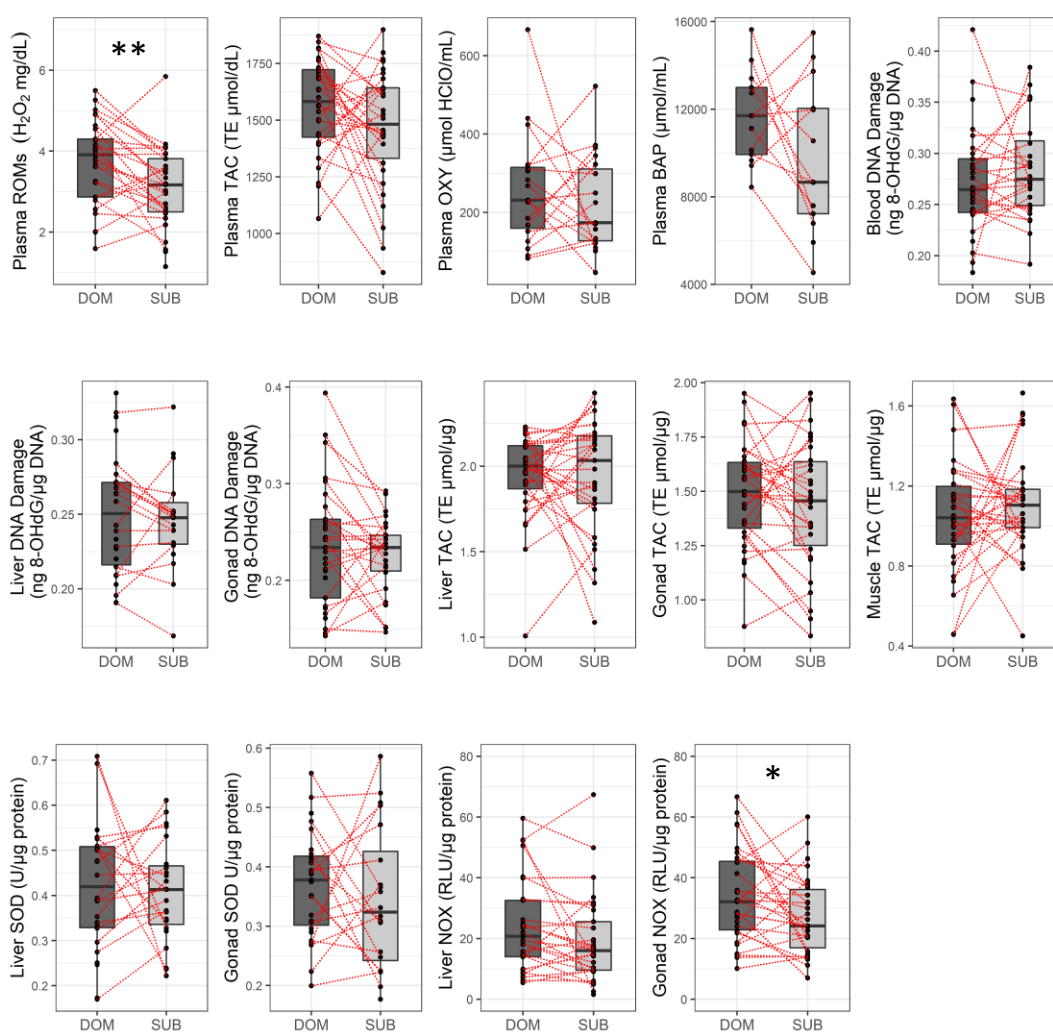

740

741

742 **Fig. 2.** Measurements of oxidative stress by social status. Reactive oxygen metabolites (ROMs)

743 and NOX (NADPH-oxidase) activity were higher in dominant males than in subordinate males.

744 The other markers did not vary by social status. Boxes enclose 25th to 75th percentiles. Error

745 bars enclose data range, excluding outliers. Dots are data points and red lines connect data for

746 males that were housed together. For statistics, see table 1. \*  $P < 0.05$ , \*\*  $P < 0.01$

747

748

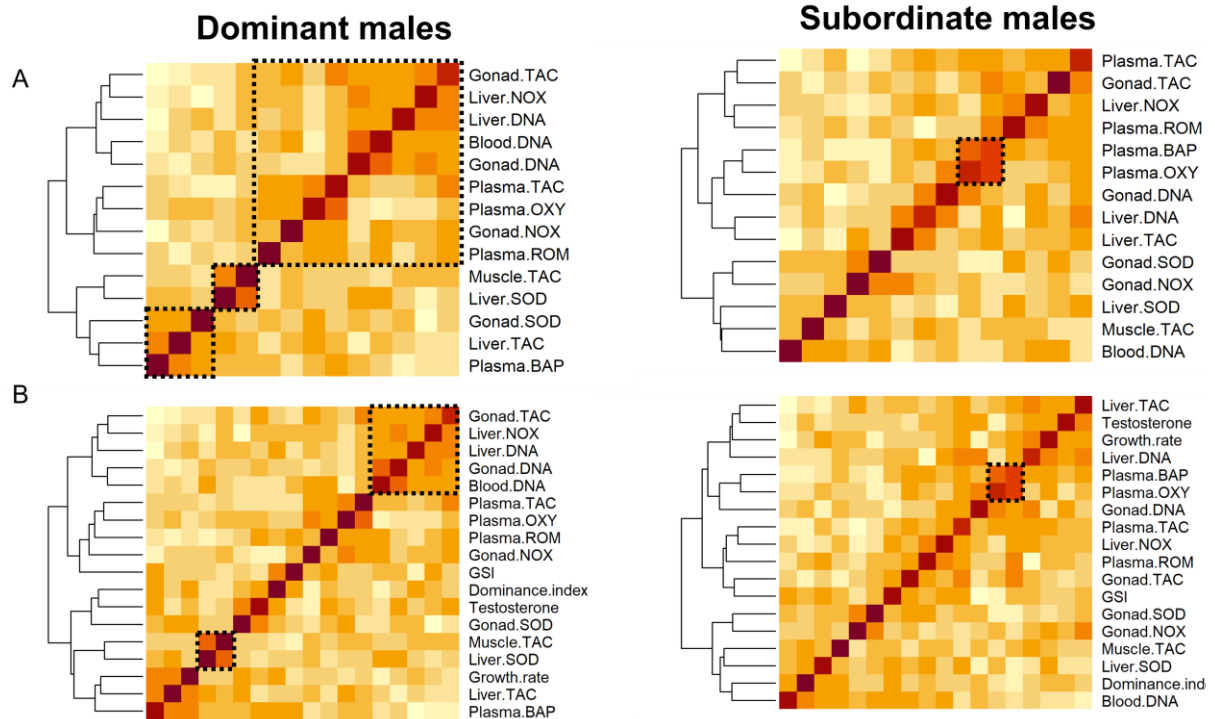

ROMs: reactive oxygen metabolites); TAC and OXY: total antioxidant capacity; BAP: biological antioxidant capacity (low molecular weight antioxidant capacity); SOD: superoxide dismutase activity, NOX: NADPH-oxidase activity. DNA: oxidative DNA damage (8-OHdG).

749 **Fig. 3.** Covariances patterns across markers of oxidative stress by status. (A) Covariance across  
 750 14 different oxidative stress measurements for dominant and subordinate males. (B) Covariance  
 751 patterns for the same oxidative stress measurements combined with indicators of reproduction  
 752 and social dominance (dominance index, gonadosomatic index (GSI), and testosterone).  
 753 Hierarchical clustering revealed more significant clusters (indicated by dashed box) in dominant  
 754 males than in subordinate males. Each cell represents the correlation value, with hotter colors  
 755 representing a more positive correlation.
